# Supplementary material for: Genomic enabled two-stage analysis of high-throughput phenotyping data in crop variety trials using adaptive splines
Source: Research Square preprint supplement (doi:10.21203/rs.3.rs-7751913/v1), 2025-10-28
Supplement: Supplementary file 2 [file cfe2a72dc552abfd6c212d9b.docx]

**Genomic enabled two-stage analysis of high-throughput phenotyping data in crop variety trials using adaptive splines**

*J. De Faveri*1,2,7*,* *A.M. Kelly3, M.V. Paccapelo4, J.T. Christopher5, A.P Verbyla*1,6

1 AV Data Analytics, SA, 5153, Australia

2 QAAFI, The University of Queensland, St Lucia, QLD 4067, Australia

3 QAAFI, The University of Queensland, Hermitage Research Facility, Warwick, QLD 4370, Australia

4 Department of Primary Industries, Leslie Research Facility, Toowoomba, QLD 4350, Australia

5 QAAFI, The University of Queensland, Leslie Research Facility, Toowoomba, QLD 4350, Australia

6 School of Agriculture, Food and Wine, The University of Adelaide, Urrbrae, SA, 5064, Australia

7 Corresponding author: email: [jdefaveri@avdataanalytics.com.au](mailto:jdefaveri@avdataanalytics.com.au)

**Appendix**

The effects taken forward from Stage 1 to Stage 2 of the analysis are inherently biased, because it is

not possible to de-regress the plot effects.

If **,**  and then

and

(A1)

Thus, the estimates of the genetic effects are conditionally biased. As ,

**+** (A2)

the plot effects are also conditionally biased. Thus, the effects taken forward to the second stage of analysis have mean

where can be found using equations (A1) and (A2). Thus, while it would be preferable to have the expectation without the bias term, it is not possible and taking forward to the second stage will incur a bias. Furthermore, calculations show

(A3)

where again there is a bias, and as the first term on the right-hand side in (A3) is taken forward as weights in the analysis, then these weights ignore the bias in the variance.
